# Supplementary material
Source: publisher figshare collection journal article supplement (https://acs.figshare.com/ndownloader/files/4278724)
Supplement: Supplementary file 1 [file 4278724]

## Examination of Surface Adsorption of Cetyltrimethylammonium Bromide and Sodium Dodecyl Sulfate

**Hiromichi Nakahara, Osamu Shibata,\* and Yoshikiyo Moroi\***

Department of Biophysical Chemistry, Faculty of Pharmaceutical Sciences,  
Nagasaki International University; 2825-7 Huis Ten Bosch,  
Sasebo, Nagasaki 859-3298, Japan

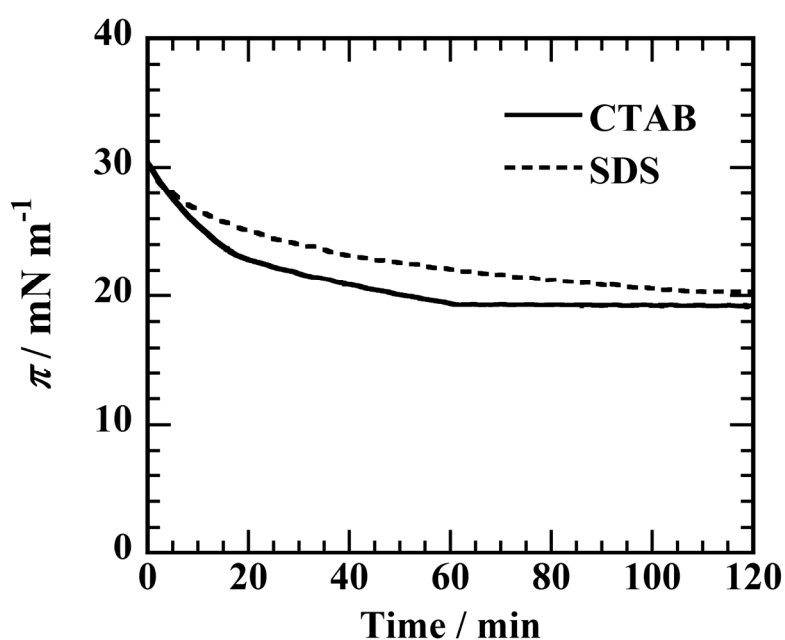

**Figure S1** Time dependence of surface pressure ( $\pi$ ) for CTAB and SDS monolayers on 5M NaBr and 5M NaCl at 298.2 K, respectively. The Langmuir monolayers were compressed up to 30 mN m<sup>-1</sup> and then the  $\pi-t$  measurements were started.

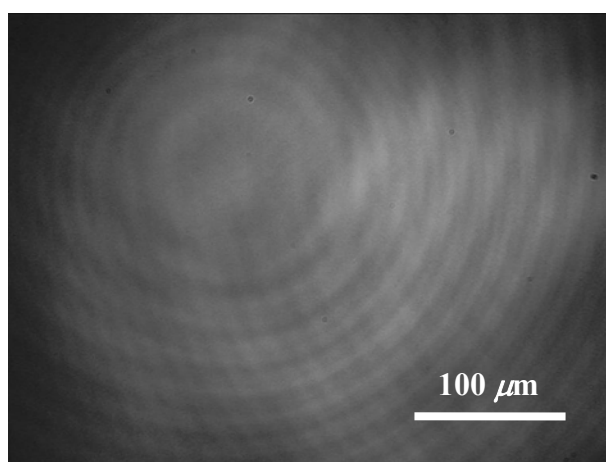

**Figure S2** BAM image for just water at 298.2 K. The image corresponds to the area of  $400\ \mu\text{m} \times 300\ \mu\text{m}$ .
